# Supplementary material for: Polyvinyl Alcohol Coatings Containing Lamellar Solids with Antimicrobial Activity
Source: Preprints.org preprint supplement (doi:10.20944/preprints202405.1396.v1), 2024-05-21
Supplement: Supplementary file 3 [file supplementary]

**Polyvinil alcohol coatings containing lamellar solids with antimicrobial activity**

Maria Bastianinia*, Michele Sisania, Raúl Escudero Garcíab, Irene Di Guidaa, Carla Russoc, Donatella Pietrellac and Riccardo Narduccib*

*a.Prolabin & Tefarm s.r.l., Via dell’Acciaio 9, 06134 Perugia, Italy.*

*b.Dep. Industrial Engineering and International Laboratory “Ionomer Materials for Energy”, Tor Vergata University of Rome, via del Politecnico 1, 00133 Roma, Italy.*

*c.Dipartimento di Medicina e Chirurgia, Università degli Studi di Perugia, Piazzale Severi, 1/8, 06129 Perugia, Italy.*



*corresponding authors

Figure S1: FT-IR spectra of the powders, ZnOH-LSH black line, ZnAl-LDH red line, ZnCuAl-LDH blue line





Figure S2: FT-IR spectra of the powders, ZnOH-CA black line, ZnAl-CA red line, ZnCuAl-CA blue line





Figure S3: FT-IR spectra of the powders, ZnOH-SAL black line, ZnAl-SAL red line, ZnCuAl-SAL blue line





Figure S4: PVA black line, ZnOH-LSH 1% brown line, ZnOH-LSH 5% dark red line, ZnOH-LSH 10% red line, ZnOH-LSH
